# Supplementary material
Source: Springer Nature journal article supplement (https://www.springermedizin.de/resource/supplementary/12957_2013_1740_MOESM4_ESM.pdf/9563366)

**(a)*****GLII* mRNA (stage III-IV)**

OAS

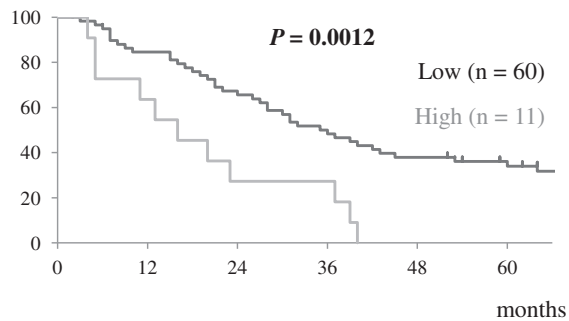***GLI3* mRNA (stage III-IV)**

OAS

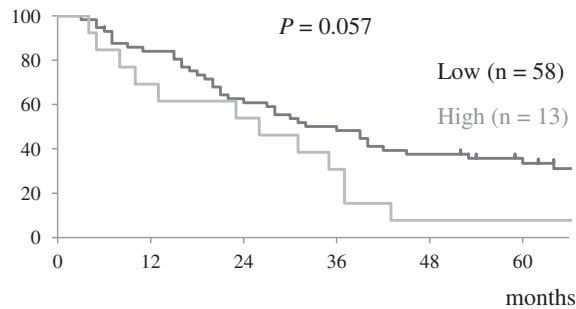**(b)*****GLII* mRNA (stage III-IV)**

DFS

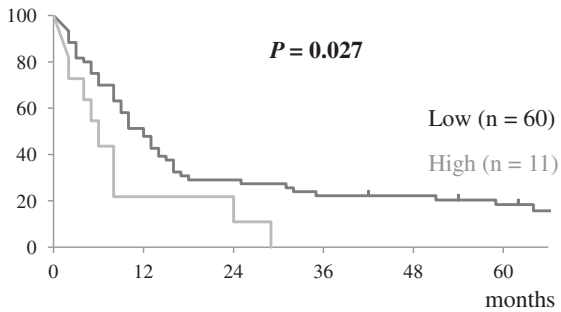***GLI3* mRNA (stage III-IV)**

DFS

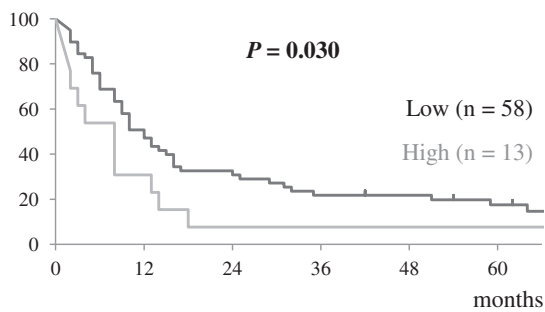

Supplement: MOESM4 [file 9563366]
